# Supplementary material for: Spectroscopic investigation of a FRET molecular beacon containing two fluorophores for probing DNA/RNA sequences†
Source: Royal Society of Chemistry journal article supplement (doi:10.1039/b600213g), 2006-03-21
Supplement: b600213g.pdf [file b600213g.pdf]

## Supporting Information

### Spectroscopic investigation of a FRET Molecular Beacon containing two fluorophores for probing DNA/RNA sequences.

Steffen Jockusch,<sup>a</sup> Angel A. Martí,<sup>a</sup> Nicholas J. Turro,<sup>a,b,\*</sup> Zengmin Li,<sup>b,c</sup> Xiaoxu Li,<sup>c</sup> Jingyue Ju,<sup>b,c</sup> Nathan Stevens,<sup>d</sup> and Daniel L. Akins<sup>d</sup>

Departments of <sup>a</sup>Chemistry and <sup>b</sup>Chemical Engineering, Columbia University, New York, NY, 10027.

<sup>c</sup>Columbia Genome Center, Columbia University College of Physicians and Surgeons, New York, NY, 10032.

<sup>d</sup>Department of Chemistry, City College, City University of New York, NY 10031.

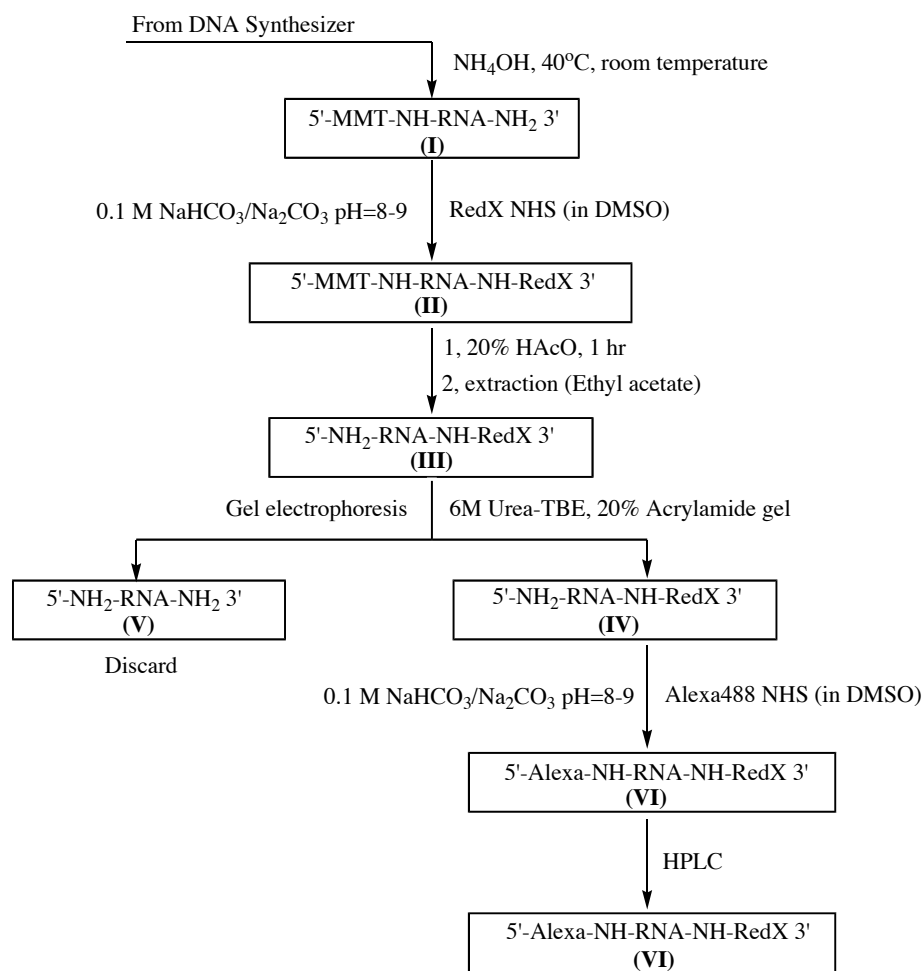

**Scheme S1:** Schematic representation of the synthesis of Alexa-MB-RedX.

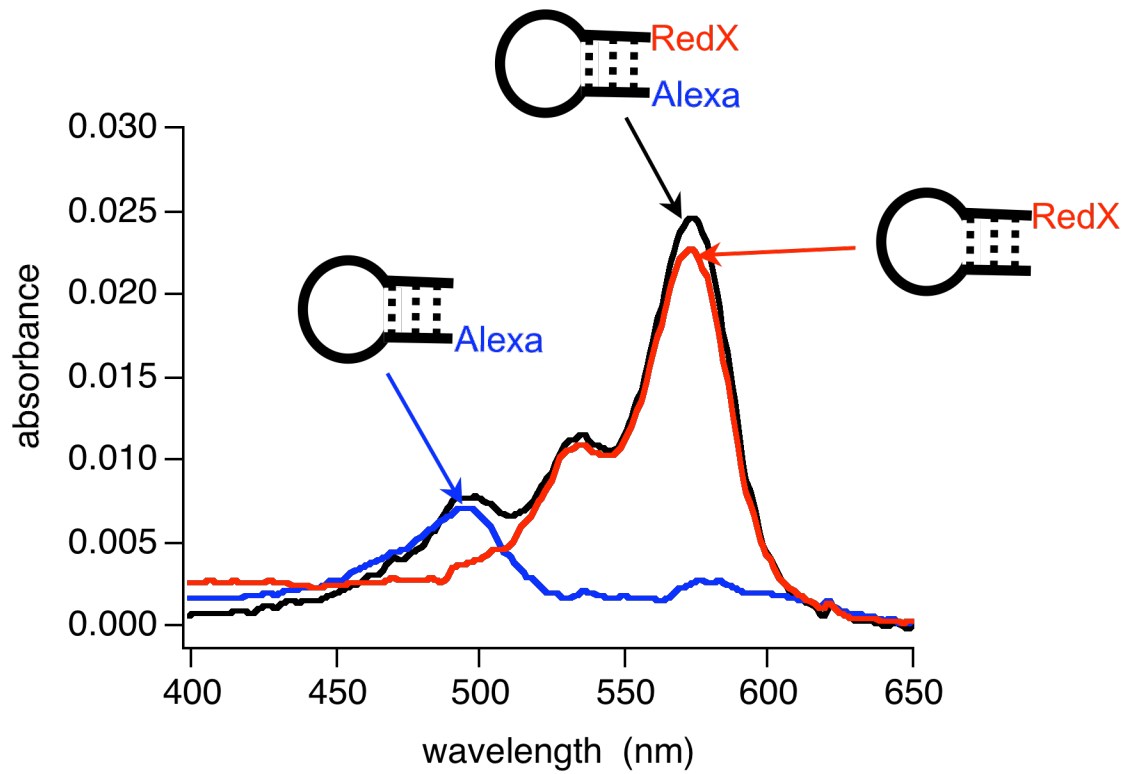

**Figure S1:** Absorbance spectra (smoothed) of Alexa-MB-RedX (black) Alexa-MB (blue) and MB-RedX (red) ( $1 \mu\text{M}$ ) in aqueous buffer solutions (20 mM Tris, 60 mM  $\text{MgCl}_2$ ), 500 mM NaCl; pH = 7.0) at a 4 mm path length.

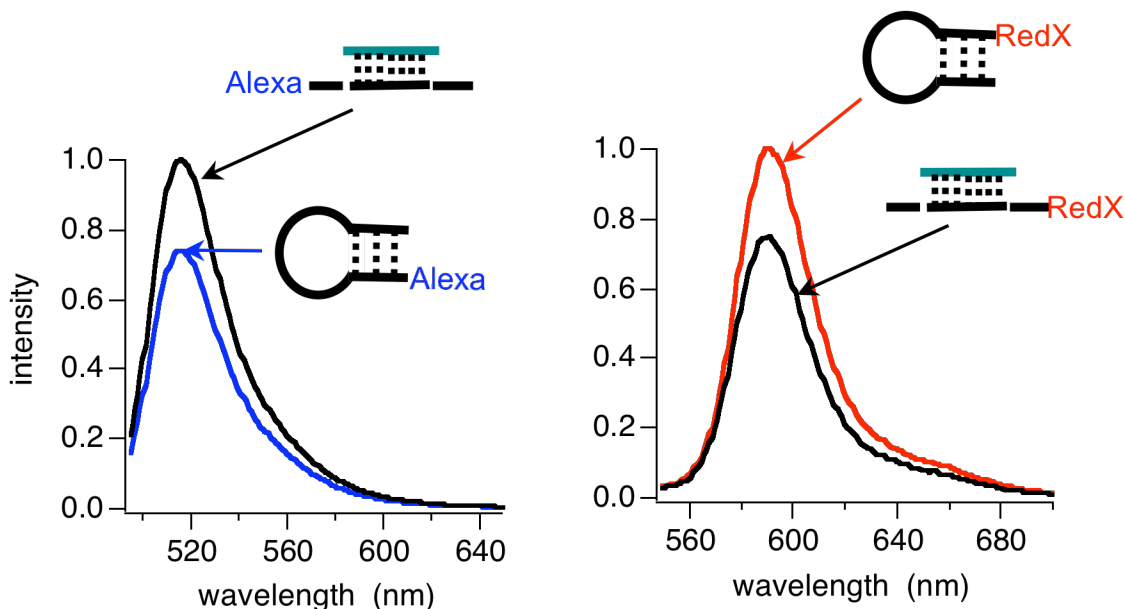

**Figure S2:** Fluorescence spectra after excitation of Alexa-MB (left) and MB-RedX (right) (1  $\mu$ M) in aqueous buffer solutions (20 mM Tris, 60 mM  $MgCl_2$ ), 500 mM NaCl; pH = 7.0) at 488 nm in the absence (blue or red spectra) and presence (black spectra) of target DNA (10  $\mu$ M).

The fluorescence intensity of the stem-open form (presence of target) increased approximately 35 % compared to the stem-closed form (Figure S2, left). This quenching effect of Alexa in the stem-closed form is probably caused by guanosine residues. Because Alexa is covalently attached to dC, in the stem-closed form dG is in close proximity due to hybridization with dC (Scheme 2) and probably causing some quenching. In the stem-open form the guanosine residue is separated from Alexa and an approximately 35 % stronger fluorescence is observed (Figure S2, left). Similar quenching effects have been reported for fluorescent dye linked oligonucleotides [Ref. 19-21]. An opposite fluorescence quenching effect has been observed for MB-RedX, where the fluorescence of RedX decreased by approximately 25 % upon hybridization with the target (Figure S2, right) This fluorescence decrease could be caused by making the guanosine residue sterically more accessible to RedX excited states in the stem-open form.

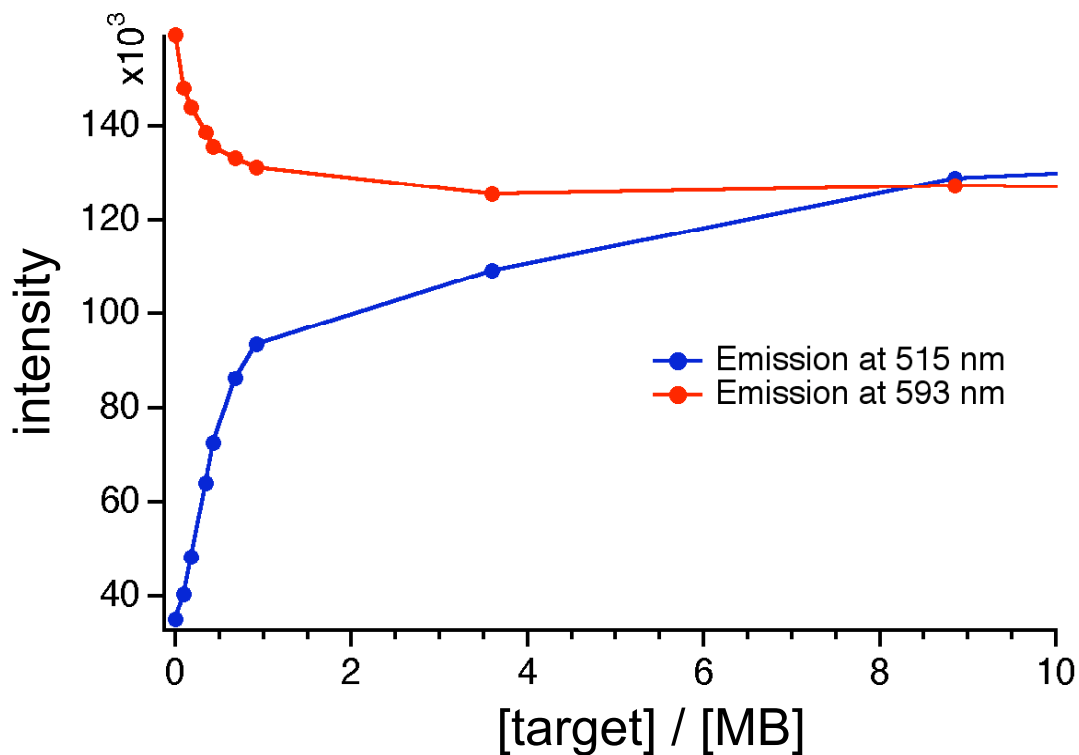

**Figure S3:** Fluorescence intensity of Alexa-MB-RedX at 515 nm (blue) and 593 nm (red) in the presence of different amounts of target DNA.  $[MB] = 0.22 \mu M$ , 10 min equilibration time between additions.

Figure S3 demonstrates that the MB opens efficiently in the presence of target DNA. At a ratio  $[MB] : [target]$  of 1 : 1, more than half of the MB opened to hybridize with the target DNA.

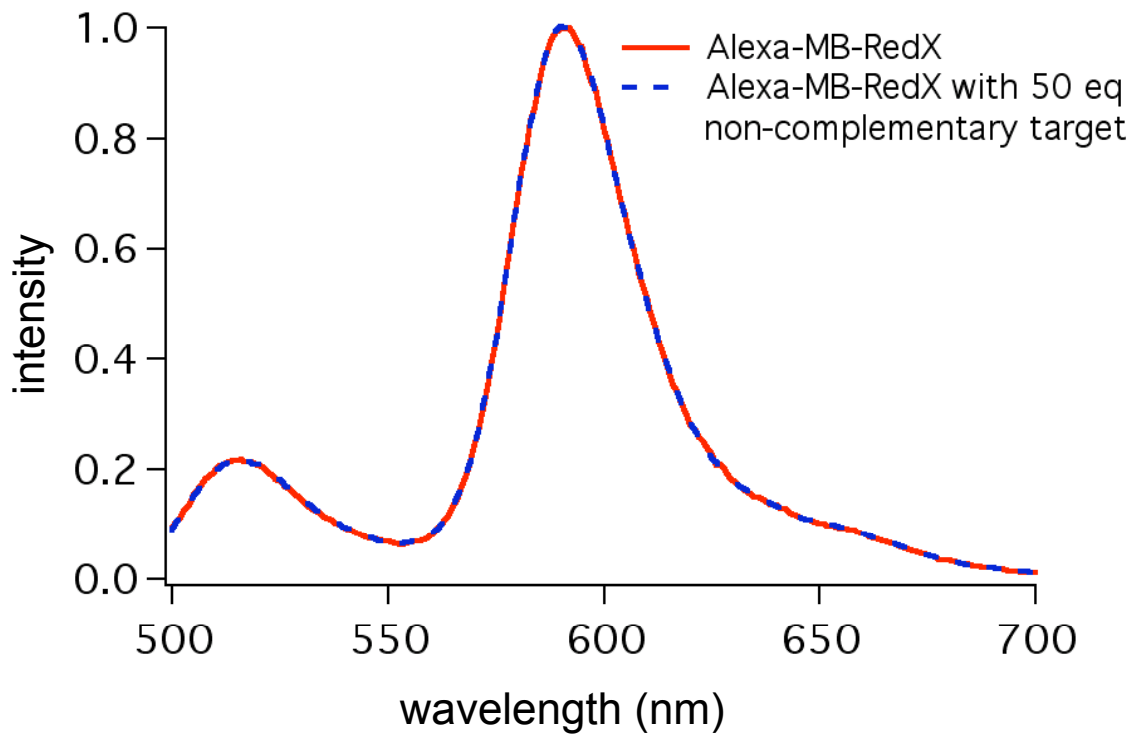

**Figure S4:** Fluorescence spectra of Alexa-MB-Rox in the absence (red) and presence (blue) of 50 equivalents of non-complementary target.  $[MB] = 0.22 \mu\text{M}$ ,  $[\text{target}] = 1.1 \mu\text{M}$ , 2h equilibration time between addition of target, non-complementary target sequence: 5'-CAT AGG TCT TAA CTT-3',  $\lambda_{\text{ex}} = 488 \text{ nm}$ .

Because the fluorescence signature of the molecular beacon, Alexa-MB-RedX, does not change after addition of a non-complementary DNA sequence, it can be concluded that the MB remains in the stem-closed configuration in the presence of an excess of DNA, which is not complimentary to the loop sequence.
